# Supplementary material
Source: PubMed Central journal article supplement (PMC3945335)
Supplement: supp_M113.507707_jbc.M113.507707-1.pdf [file supp_M113.507707_jbc.M113.507707-1.pdf]

## **SUPPLEMENTAL DATA**

### **Charge Segregation and Low Hydrophobicity Are Key Features of Ribosomal Proteins from Different Organisms\***

Daria V. Fedyukina, Theodore S. Jennaro and Silvia Cavagnero

From the Department of Chemistry  
University of Wisconsin-Madison, Madison, WI 53706

\*Running Title: *Electrostatic and nonpolar properties of ribosomal proteins*

To whom correspondence should be addressed: Silvia Cavagnero, Department of Chemistry, University of Wisconsin-Madison, 1101 University Ave., Madison, WI 53706, USA, Tel.: (608) 262-5430; Fax: (608) 262-9918; E-mail: cavagnero@chem.wisc.edu

## Supplemental Text

The data provided here illustrate the percent of positively and negatively charged solvent-accessible surface area (%ASA<sub>+</sub> and %ASA<sub>-</sub>) of each protein embedded within the large ribosomal subunit of five different organisms (*D. radiodurans*, *E. coli*, *H. marismortui*, *S. cerevisiae*, and *T. thermophilus*). Corresponding values averaged over all proteins of each organism (~~%ASA<sub>+</sub> and %ASA<sub>-</sub>~~) are reported in Table 6 of the main text. Data were generated for positively and negatively charged functional groups of each ribosomal protein with available PDB coordinates, as described in the main text. The results are summarized in the five Supplemental Tables below.

## Supplemental Tables

**Supplemental Table 1. Percent of positively and negatively charged solvent-accessible surface area of proteins embedded within the large ribosomal subunit of *D. radiodurans*.**

| Ribosomal protein | Percent of positively charged ASA (%ASA <sub>+</sub> ) | Percent of negatively charged ASA (%ASA <sub>-</sub> ) | Ribosomal protein | Percent of positively charged ASA (%ASA <sub>+</sub> ) | Percent of negatively charged ASA (%ASA <sub>-</sub> ) |
|-------------------|--------------------------------------------------------|--------------------------------------------------------|-------------------|--------------------------------------------------------|--------------------------------------------------------|
| L2                | 58%                                                    | 67%                                                    | L20               | 40%                                                    | 60%                                                    |
| L3                | 45%                                                    | 86%                                                    | L21               | 37%                                                    | 91%                                                    |
| L4                | 53%                                                    | 93%                                                    | L22               | 50%                                                    | 79%                                                    |
| L5                | 75%                                                    | 86%                                                    | L23               | 58%                                                    | 90%                                                    |
| L6                | 75%                                                    | 100%                                                   | L24               | 69%                                                    | 100%                                                   |
| L11               | 84%                                                    | 99%                                                    | L25               | 74%                                                    | 96%                                                    |
| L13               | 52%                                                    | 82%                                                    | L27               | 56%                                                    | 58%                                                    |
| L14               | 64%                                                    | 70%                                                    | L28               | 55%                                                    | 100%                                                   |
| L15               | 49%                                                    | 83%                                                    | L29               | 74%                                                    | 85%                                                    |
| L16               | 55%                                                    | 60%                                                    | L30               | 64%                                                    | 98%                                                    |
| L17               | 43%                                                    | 81%                                                    | L32               | 32%                                                    | 77%                                                    |
| L18               | 64%                                                    | 93%                                                    | L36               | 41%                                                    | 90%                                                    |
| L19               | 57%                                                    | 73%                                                    | <b>Average</b>    | <b>57%</b>                                             | <b>84%</b>                                             |

**Supplemental Table 2. Percent of positively and negatively charged solvent-accessible surface area of proteins embedded within the large ribosomal subunit of *E. coli*.**

| <b>Ribosomal protein</b> | <b>Percent of positively charged ASA (%ASA<sub>+</sub>)</b> | <b>Percent of negatively charged ASA (%ASA<sub>-</sub>)</b> | <b>Ribosomal protein</b> | <b>Percent of positively charged ASA (%ASA<sub>+</sub>)</b> | <b>Percent of negatively charged ASA (%ASA<sub>-</sub>)</b> |
|--------------------------|-------------------------------------------------------------|-------------------------------------------------------------|--------------------------|-------------------------------------------------------------|-------------------------------------------------------------|
| L2                       | 61%                                                         | 65%                                                         | L21                      | 53%                                                         | 87%                                                         |
| L3                       | 63%                                                         | 89%                                                         | L22                      | 43%                                                         | 48%                                                         |
| L4                       | 51%                                                         | 89%                                                         | L23                      | 58%                                                         | 81%                                                         |
| L5                       | 84%                                                         | 91%                                                         | L24                      | 70%                                                         | 99%                                                         |
| L6                       | 82%                                                         | 98%                                                         | L25                      | 69%                                                         | 83%                                                         |
| L13                      | 50%                                                         | 83%                                                         | L27                      | 44%                                                         | 54%                                                         |
| L14                      | 68%                                                         | 65%                                                         | L29                      | 66%                                                         | 92%                                                         |
| L15                      | 53%                                                         | 86%                                                         | L31                      | 63%                                                         | 64%                                                         |
| L16                      | 62%                                                         | 77%                                                         | L32                      | 38%                                                         | 96%                                                         |
| L17                      | 53%                                                         | 79%                                                         | L33                      | 74%                                                         | 32%                                                         |
| L18                      | 65%                                                         | 75%                                                         | L34                      | 41%                                                         | N/A                                                         |
| L19                      | 76%                                                         | 69%                                                         | L35                      | 31%                                                         | 68%                                                         |
| L20                      | 33%                                                         | 6%                                                          | L36                      | 33%                                                         | 94%                                                         |
|                          |                                                             |                                                             | <b>Average</b>           | <b>57%</b>                                                  | <b>75%</b>                                                  |

**Supplemental Table 3. Percent of positively and negatively charged solvent-accessible surface area of proteins embedded within the large ribosomal subunit of *H. marismortui*.**

| <b>Ribosomal protein</b> | <b>Percent of positively charged ASA (%ASA<sub>+</sub>)</b> | <b>Percent of negatively charged ASA (%ASA<sub>-</sub>)</b> | <b>Ribosomal protein</b> | <b>Percent of positively charged ASA (%ASA<sub>+</sub>)</b> | <b>Percent of negatively charged ASA (%ASA<sub>-</sub>)</b> |
|--------------------------|-------------------------------------------------------------|-------------------------------------------------------------|--------------------------|-------------------------------------------------------------|-------------------------------------------------------------|
| L2p                      | 44%                                                         | 76%                                                         | L21e                     | 43%                                                         | 87%                                                         |
| L3p                      | 36%                                                         | 86%                                                         | L22p                     | 54%                                                         | 92%                                                         |
| L4p                      | 34%                                                         | 87%                                                         | L23p                     | 46%                                                         | 87%                                                         |
| L5p                      | 55%                                                         | 79%                                                         | L24e                     | 66%                                                         | 75%                                                         |
| L6p                      | 63%                                                         | 94%                                                         | L24p                     | 37%                                                         | 84%                                                         |
| L7Ae                     | 74%                                                         | 90%                                                         | L29p                     | 51%                                                         | 89%                                                         |
| L10e                     | 54%                                                         | 90%                                                         | L30p                     | 45%                                                         | 88%                                                         |
| L11p                     | 92%                                                         | 96%                                                         | L31e                     | 57%                                                         | 91%                                                         |
| L13p                     | 49%                                                         | 89%                                                         | L32e                     | 36%                                                         | 91%                                                         |
| L14p                     | 56%                                                         | 85%                                                         | L37Ae                    | 68%                                                         | 96%                                                         |
| L15e                     | 30%                                                         | 73%                                                         | L37e                     | 29%                                                         | 74%                                                         |
| L16e                     | 34%                                                         | 86%                                                         | L39e                     | 39%                                                         | 52%                                                         |
| L18p                     | 39%                                                         | 93%                                                         | L44e                     | 60%                                                         | 94%                                                         |
| L19e                     | 39%                                                         | 89%                                                         | <b>Average</b>           | <b>49%</b>                                                  | <b>86%</b>                                                  |

**Supplemental Table 4. Percent of positively and negatively charged solvent-accessible surface area of proteins embedded within the large ribosomal subunit of *S. cerevisiae*.**

| <b>Ribosomal protein</b> | <b>Percent of positively charged ASA (%ASA<sub>+</sub>)</b> | <b>Percent of negatively charged ASA (%ASA<sub>-</sub>)</b> | <b>Ribosomal protein</b> | <b>Percent of positively charged ASA (%ASA<sub>+</sub>)</b> | <b>Percent of negatively charged ASA (%ASA<sub>-</sub>)</b> |
|--------------------------|-------------------------------------------------------------|-------------------------------------------------------------|--------------------------|-------------------------------------------------------------|-------------------------------------------------------------|
| L2A                      | 40%                                                         | 69%                                                         | L23A                     | 58%                                                         | 76%                                                         |
| L3                       | 52%                                                         | 84%                                                         | L25                      | 56%                                                         | 96%                                                         |
| L5                       | 53%                                                         | 95%                                                         | L26A                     | 49%                                                         | 80%                                                         |
| L6A                      | 52%                                                         | 86%                                                         | L27A                     | 55%                                                         | 94%                                                         |
| L7A                      | 41%                                                         | 73%                                                         | L28                      | 40%                                                         | 69%                                                         |
| L8A                      | 55%                                                         | 81%                                                         | L29                      | 52%                                                         | 84%                                                         |
| L9A                      | 57%                                                         | 85%                                                         | L31A                     | 53%                                                         | 95%                                                         |
| L10                      | 62%                                                         | 84%                                                         | L32                      | 52%                                                         | 86%                                                         |
| L11A                     | 52%                                                         | 93%                                                         | L33A                     | 41%                                                         | 73%                                                         |
| L13A                     | 39%                                                         | 80%                                                         | L34A                     | 55%                                                         | 81%                                                         |
| L14A                     | 45%                                                         | 74%                                                         | L35A                     | 57%                                                         | 85%                                                         |
| L15A                     | 45%                                                         | 44%                                                         | L36A                     | 62%                                                         | 84%                                                         |
| L16                      | 57%                                                         | 100%                                                        | L37A                     | 52%                                                         | 93%                                                         |
| L17A                     | 53%                                                         | 95%                                                         | L38                      | 79%                                                         | 73%                                                         |
| L18A                     | 41%                                                         | 70%                                                         | L39                      | 39%                                                         | 80%                                                         |
| L19A                     | 57%                                                         | 97%                                                         | L40                      | 45%                                                         | 74%                                                         |
| L20A                     | 46%                                                         | 81%                                                         | L41A                     | 45%                                                         | 44%                                                         |
| L21A                     | 41%                                                         | 87%                                                         | L42A                     | 57%                                                         | 100%                                                        |
| L22A                     | 46%                                                         | 100%                                                        | L43A                     | 53%                                                         | 95%                                                         |
|                          |                                                             |                                                             | <b>Average</b>           | <b>51%</b>                                                  | <b>83%</b>                                                  |

**Supplemental Table 5. Percent of positively and negatively charged solvent-accessible surface area of proteins embedded within the large ribosomal subunit of *T. thermophilus*.**

| <b>Ribosomal protein</b> | <b>Percent of positively charged ASA (%ASA<sub>+</sub>)</b> | <b>Percent of negatively charged ASA (%ASA<sub>-</sub>)</b> | <b>Ribosomal protein</b> | <b>Percent of positively charged ASA (%ASA<sub>+</sub>)</b> | <b>Percent of negatively charged ASA (%ASA<sub>-</sub>)</b> |
|--------------------------|-------------------------------------------------------------|-------------------------------------------------------------|--------------------------|-------------------------------------------------------------|-------------------------------------------------------------|
| L2                       | 46%                                                         | 74%                                                         | L20                      | 32%                                                         | 44%                                                         |
| L3                       | 53%                                                         | 82%                                                         | L21                      | 48%                                                         | 98%                                                         |
| L4                       | 47%                                                         | 90%                                                         | L22                      | 49%                                                         | 81%                                                         |
| L5                       | 73%                                                         | 86%                                                         | L23                      | 46%                                                         | 65%                                                         |
| L6                       | 84%                                                         | 100%                                                        | L24                      | 68%                                                         | 87%                                                         |
| L7/12                    | 89%                                                         | 80%                                                         | L25                      | 74%                                                         | 85%                                                         |
| L9                       | 89%                                                         | 100%                                                        | L27                      | 48%                                                         | 61%                                                         |
| L10                      | 73%                                                         | 82%                                                         | L28                      | 53%                                                         | 76%                                                         |
| L11                      | 84%                                                         | 95%                                                         | L29                      | 66%                                                         | 91%                                                         |
| L13                      | 59%                                                         | 93%                                                         | L30                      | 66%                                                         | 100%                                                        |
| L14                      | 62%                                                         | 69%                                                         | L31                      | 90%                                                         | 88%                                                         |
| L15                      | 44%                                                         | 85%                                                         | L32                      | 42%                                                         | 95%                                                         |
| L16                      | 53%                                                         | 63%                                                         | L33                      | 70%                                                         | 38%                                                         |
| L17                      | 45%                                                         | 87%                                                         | L34                      | 34%                                                         | N/A                                                         |
| L18                      | 54%                                                         | 92%                                                         | L35                      | 30%                                                         | 55%                                                         |
| L19                      | 70%                                                         | 82%                                                         | <b>Average</b>           | <b>59%</b>                                                  | <b>81%</b>                                                  |
